# Supplementary material
Source: PubMed Central journal article supplement (PMC10995917)
Supplement: NIHMS1971506-supplement-Supplementary_Material.pdf [file NIHMS1971506-supplement-Supplementary_Material.pdf]

## Supplemental Information

| <b>SUPPLEMENTAL TABLE 5</b> Sample Characteristics of Current E-Cigarette Users With Past-Year Quit Attempts, 2021 NYTS |          |                   |                     |
|-------------------------------------------------------------------------------------------------------------------------|----------|-------------------|---------------------|
| Sample Characteristics                                                                                                  | <i>n</i> | Weighted <i>N</i> | Weighted % (95% CI) |
| Overall                                                                                                                 | 889      | 1 271 000         | 100                 |
| Sex                                                                                                                     |          |                   |                     |
| Male                                                                                                                    | 415      | 620 000           | 49.2 (43.5–54.8)    |
| Female                                                                                                                  | 469      | 641 000           | 50.8 (45.2–56.5)    |
| Grade                                                                                                                   |          |                   |                     |
| Middle school                                                                                                           | 196      | 208 000           | 16.4 (11.6–21.3)    |
| High school                                                                                                             | 688      | 1 058 000         | 83.6 (78.7–88.4)    |
| Race/ethnicity                                                                                                          |          |                   |                     |
| NH white                                                                                                                | 578      | 880 000           | 70.1 (63.2–77)      |
| NH Black                                                                                                                | 82       | 93 000            | 7.4 (4.5–10.4)      |
| Hispanic                                                                                                                | 183      | 240 000           | 19.1 (14.4–23.9)    |
| Others                                                                                                                  | 36       | 42 000            | 3.3 (1.6–5.1)       |
| Sexual minority                                                                                                         |          |                   |                     |
| Heterosexual                                                                                                            | 561      | 803 000           | 68.8 (68.8–77.1)    |
| Gay/lesbian                                                                                                             | 33       | 60 000            | 3.3 (3.3–7.5)       |
| Bisexual                                                                                                                | 132      | 176 000           | 12.6 (12.6–19.4)    |
| Unsure                                                                                                                  | 48       | 62 000            | 3.6 (3.6–7.7)       |
| Frequency and duration of e-cigarette use                                                                               |          |                   |                     |
| Low frequency-low duration                                                                                              | 214      | 279 000           | 22.1 (17.9–26.4)    |
| Low frequency-high duration                                                                                             | 194      | 304 000           | 24.1 (19.2–29.0)    |
| High frequency-low duration                                                                                             | 139      | 165 000           | 13.0 (10.1–15.9)    |
| High frequency-high duration                                                                                            | 333      | 515 000           | 40.8 (35.4–46.1)    |
| Type of e-cigarette used in the past 30 days                                                                            |          |                   |                     |
| A disposable e-cigarette                                                                                                | 476      | 693 000           | 54.7 (49.3–60.2)    |
| An e-cigarette with prefilled pods or cartridges                                                                        | 260      | 359 000           | 28.3 (24.3–32.4)    |
| An e-cigarette with a tank                                                                                              | 68       | 90 000            | 7.1 (4.4–9.8)       |
| I don't know the type                                                                                                   | 81       | 124 000           | 9.8 (7.1–12.6)      |
| Multiple tobacco product use                                                                                            |          |                   |                     |
| Sole e-cigarette                                                                                                        | 572      | 825 000           | 67.5 (62.7–72.4)    |
| Dual/poly use                                                                                                           | 280      | 396 000           | 32.5 (27.6–37.3)    |
| Flavor use in e-cigarette                                                                                               |          |                   |                     |
| No                                                                                                                      | 153      | 218 000           | 17.1 (13.4–20.9)    |
| Yes                                                                                                                     | 736      | 1 053 000         | 82.9 (79.1–86.6)    |
| Perceived harmfulness of e-cigarette use                                                                                |          |                   |                     |
| No harm/little harm                                                                                                     | 307      | 414 000           | 36.6 (31.9–41.3)    |
| Some harm/a lot of harm                                                                                                 | 494      | 717 000           | 63.4 (58.7–68.1)    |
| Symptoms of nicotine dependence                                                                                         |          |                   |                     |
| No                                                                                                                      | 584      | 812 000           | 67.7 (63–72.4)      |
| Yes                                                                                                                     | 255      | 387 000           | 32.3 (27.6–37)      |
| Tobacco use by household members                                                                                        |          |                   |                     |
| None                                                                                                                    | 311      | 439 000           | 41.3 (36.0–46.6)    |
| Other tobacco products                                                                                                  | 210      | 309 000           | 29.1 (24.6–33.5)    |
| E-cigarettes                                                                                                            | 231      | 315 000           | 29.6 (24.6–34.7)    |
| Perceived peer use of e-cigarettes, median (IQR)                                                                        |          |                   | 6.1 (4.1–8.0)       |

CI, confidence interval; IQR, interquartile range; NYTS, National Youth Tobacco Survey.

|                                                  | Friend Support |      | Internet      |      | A Mobile App or Text Messaging |        | Parent Support |       |
|--------------------------------------------------|----------------|------|---------------|------|--------------------------------|--------|----------------|-------|
|                                                  | OR             | P    | OR            | P    | OR                             | P      | OR             | P     |
| Overall                                          |                |      |               |      |                                |        |                |       |
| Sex                                              |                |      |               |      |                                |        |                |       |
| Male                                             | Ref            | Ref  | Ref           | Ref  | Ref                            | Ref    | Ref            | Ref   |
| Female                                           | 0.8 (0.5–1.4)  | .46  | 1.1 (0.5–2.5) | .88  | 0.9 (0.4–1.8)                  | .78    | 0.3 (0.1–0.7)  | .01   |
| Grade                                            |                |      |               |      |                                |        |                |       |
| Middle school                                    | Ref            | Ref  | Ref           | Ref  | Ref                            | Ref    | Ref            | Ref   |
| High school                                      | 0.5 (0.2–1.2)  | 0.12 | 0.9 (0.4–1.8) | 0.69 | 2.9 (1.1–7.6)                  | .03    | 0.8 (0.3–2.0)  | .65   |
| Race/ethnicity                                   |                |      |               |      |                                |        |                |       |
| NH white                                         | Ref            | Ref  | Ref           | Ref  | Ref                            | Ref    | Ref            | Ref   |
| NH Black                                         | 1.2 (0.3–4.1)  | .81  | 1.1 (0.4–3.1) | .84  | 0.7 (0.3–1.9)                  | .48    | 1.5 (0.4–5.8)  | .54   |
| Hispanic                                         | 2.0 (1.0–4.2)  | .06  | 1.0 (0.5–2.1) | .97  | 1.1 (0.5–2.5)                  | .88    | 2.7 (1.3–5.6)  | .01   |
| Others                                           | 1.2 (0.3–4.4)  | .83  | 1.2 (0.3–4.5) | .80  | 1.3 (0.3–6.1)                  | .71    | 1.3 (0.3–6.2)  | .70   |
| Sexual minority                                  |                |      |               |      |                                |        |                |       |
| Heterosexual                                     | Ref            | Ref  | Ref           | Ref  | Ref                            | Ref    | Ref            | Ref   |
| Gay/lesbian                                      | 3.3 (1.4–7.9)  | .01  | 3.0 (1.0–9.6) | .06  | 5.3 (1.8–15.5)                 | .003   | 1.7 (0.4–7.2)  | .49   |
| Bisexual                                         | 1.3 (0.6–3.0)  | .51  | 3.3 (1–10.4)  | .05  | 1.6 (0.6–4.3)                  | .31    | 1.6 (0.6–4.4)  | .36   |
| Unsure                                           | 0.4 (0.1–1.6)  | .21  | 1.3 (0.3–5.2) | .75  | 1.1 (0.3–4.2)                  | .88    | 0.5 (0.1–3.7)  | .48   |
| Frequency and duration of e-cigarette use        |                |      |               |      |                                |        |                |       |
| Low frequency-low duration                       | Ref            | Ref  | Ref           | Ref  | Ref                            | Ref    | Ref            | Ref   |
| Low frequency-high duration                      | 1.2 (0.5–2.6)  | .69  | 1.3 (0.5–2.9) | .58  | 7.7 (1.6–37.7)                 | .01    | 0.9 (0.2–5.0)  | .91   |
| High frequency-low duration                      | 2.0 (0.9–4.6)  | .09  | 1.6 (0.6–4.2) | .38  | 10 (2–49.8)                    | .006   | 1.1 (0.3–4.2)  | .85   |
| High frequency-high duration                     | 1.4 (0.6–3.3)  | .43  | 1.5 (0.5–4.2) | .47  | 26.9 (6.8–106)                 | <.0001 | 0.9 (0.3–2.5)  | .89   |
| Type of e-cigarette used in the past 30 days     |                |      |               |      |                                |        |                |       |
| A disposable e-cigarette                         | Ref            | Ref  | Ref           | Ref  | Ref                            | Ref    | Ref            | Ref   |
| An e-cigarette with prefilled pods or cartridges | 1.4 (0.8–2.4)  | .27  | 1.4 (0.6–3.2) | .37  | 1.0 (0.4–2.3)                  | .91    | 1.2 (0.5–3.3)  | .69   |
| An e-cigarette with a tank                       | 0.7 (0.2–2.9)  | .63  | 1.2 (0.2–7.7) | .82  | 0.5 (0.2–1.4)                  | .21    | 5.9 (1.7–20.9) | .006  |
| I don't know the type                            | 1.4 (0.7–3.1)  | .34  | 1.8 (0.6–5.8) | .30  | 0.8 (0.2–3.1)                  | .75    | 8.6 (2.8–26.1) | .0002 |
| Multiple tobacco product use                     |                |      |               |      |                                |        |                |       |
| Sole e-cigarette                                 | Ref            | Ref  | Ref           | Ref  | Ref                            | Ref    | Ref            | Ref   |
| Dual use                                         | 1.6 (0.9–2.7)  | .09  | 2.1 (1.0–4.4) | .05  | 1.2 (0.5–2.9)                  | .64    | 2.0 (0.8–4.8)  | .11   |
| Flavor use in e-cigarette                        |                |      |               |      |                                |        |                |       |
| No                                               | Ref            | Ref  | Ref           | Ref  | Ref                            | Ref    | Ref            | Ref   |
| Yes                                              | 1.7 (0.9–3.3)  | .13  | 1.3 (0.4–4.0) | .68  | 0.9 (0.4–2.3)                  | .90    | 0.8 (0.3–2.3)  | .67   |
| Perceived harmfulness of e-cigarette use         |                |      |               |      |                                |        |                |       |
| No harm/little harm                              | Ref            | Ref  | Ref           | Ref  | Ref                            | Ref    | Ref            | Ref   |
| Some harm/a lot of harm                          | 0.5 (0.3–0.8)  | .01  | 0.8 (0.3–1.8) | .54  | 2.6 (1.1–6.5)                  | .04    | 1.0 (0.4–2.6)  | .99   |
| Symptoms of nicotine dependence                  |                |      |               |      |                                |        |                |       |
| No                                               | Ref            | Ref  | Ref           | Ref  | Ref                            | Ref    | Ref            | Ref   |
| Yes                                              | 2.0 (1.2–3.1)  | .01  | 2.9 (1.5–5.8) | .003 | 1.6 (0.7–4.0)                  | .27    | 1.4 (0.7–2.9)  | .38   |
| Tobacco use by household members                 |                |      |               |      |                                |        |                |       |
| None                                             | Ref            | Ref  | Ref           | Ref  | Ref                            | Ref    | Ref            | Ref   |
| Other tobacco products                           | 0.9 (0.4–1.8)  | .68  | 1.2 (0.6–2.8) | .58  | 0.5 (0.2–1.4)                  | .20    | 0.9 (0.3–2.8)  | .83   |
| E-cigarettes                                     | 1.0 (0.5–2.0)  | .96  | 1.8 (0.8–4.1) | .18  | 0.6 (0.2–1.6)                  | .35    | 1.8 (0.6–5.5)  | .31   |
| Perceived peer use of e-cigarettes               | 1.0 (0.9–1.1)  | .98  | 1.0 (0.8–1.2) | .84  | 1.0 (0.9–1.1)                  | .33    | 1.1 (0.9–1.3)  | .48   |

NH, non-Hispanic; OR, odds ratio.
